# Supplementary material for: Cough-aerosol cultures of Mycobacterium tuberculosis in the prediction of outcomes after exposure. A household contact study in Brazil
Source: PLoS One. 2018 Oct 29;13(10):e0206384. doi: 10.1371/journal.pone.0206384 (PMC6205616; doi:10.1371/journal.pone.0206384)
Supplement: S1 Dataset — (XLSX) [file pone.0206384.s002.xlsx]

## Sheet: HHCs
indexid	contactid	ageindex	genderindex	numberofcontacts	timesick	VACS	leicester	cavities	extent	weightindex	heightindex	bmiindex	karnofski	rooms	windows	doors	aerosolCFU	aerosol	mgit	ttpmgit	ttpcass	ttpsol	abtime	AFB1	AFB2	AFB3	AFBmax	spvol	peakflow	coughstrenght	HHCgender	HHCage	ppd1	ppd2	qfgold1	qfgold2	qfgoldmax	outcome
CA307300	CA307301	29	1	4	12	9	11	1	3	62.7	1.71	21.4425	90	6	4	2	29	2			14	32	0	2	2	2	2	5	49	2	2	23	23			10	10	2
CA307300	CA307302	29	1	4	12	9	11	1	3	62.7	1.71	21.4425	90	6	4	2	29	2			14	32	0	2	2	2	2	5	49	2	2	52	0	8		8.08	8.08	0
CA307300	CA307303	29	1	4	12	9	11	1	3	62.7	1.71	21.4425	90	6	4	2	29	2			14	32	0	2	2	2	2	5	49	2	1	33	20			10	10	2
CA307400	CA307401	32	1	3	8	8	13	0	2	47.5	1.69	16.6311	90	5	4	2	85	2			12	48	0	3	3	3	3	2	53	2	1	6	11			0.02	0.02	2
CA307400	CA307402	32	1	3	8	8	13	0	2	47.5	1.69	16.6311	90	5	4	2	85	2			12	48	0	3	3	3	3	2	53	2	2	43	15			1.02	1.02	2
CA307400	CA307403	32	1	3	8	8	13	0	2	47.5	1.69	16.6311	90	5	4	2	85	2			12	48	0	3	3	3	3	2	53	2	1	20	14			0.14	0.14	2
CA307600	CA307601	22	1	6	12	9	12	1	3	51.5	1.69	18.0316	90	6	2	1	2	1	1	3	21	15	0	3	3	3	3	1	230	2	1	75	17			2.72	2.72	2
CA307600	CA307602	22	1	6	12	9	12	1	3	51.5	1.69	18.0316	90	6	2	1	2	1	1	3	21	15	0	3	3	3	3	1	230	2	2	52	22			10	10	2
CA307600	CA307604	22	1	6	12	9	12	1	3	51.5	1.69	18.0316	90	6	2	1	2	1	1	3	21	15	0	3	3	3	3	1	230	2	2	17	21			10	10	2
CA307600	CA307605	22	1	6	12	9	12	1	3	51.5	1.69	18.0316	90	6	2	1	2	1	1	3	21	15	0	3	3	3	3	1	230	2	2	15	20			7.41	7.41	2
CA307700	CA307701	19	1	6	12	9	11	1	3	55	1.69	19.257	90	6	2	2	1	1			18		0	3	3	3	3		430	3	2	51	12			10	10	2
CA307700	CA307702	19	1	6	12	9	11	1	3	55	1.69	19.257	90	6	2	2	1	1			18		0	3	3	3	3		430	3	1	48	20			1.25	1.25	2
CA307700	CA307703	19	1	6	12	9	11	1	3	55	1.69	19.257	90	6	2	2	1	1			18		0	3	3	3	3		430	3	2	15	19			10	10	2
CA307700	CA307704	19	1	6	12	9	11	1	3	55	1.69	19.257	90	6	2	2	1	1			18		0	3	3	3	3		430	3	1	23	13			10	10	2
CA307700	CA307705	19	1	6	12	9	11	1	3	55	1.69	19.257	90	6	2	2	1	1			18		0	3	3	3	3		430	3	1	22	23			9.32	9.32	2
CA307700	CA307706	19	1	6	12	9	11	1	3	55	1.69	19.257	90	6	2	2	1	1			18		0	3	3	3	3		430	3	2	17	20					2
CA307800	CA307801	42	1	4	24	9	11	1	3	46.5	1.63	17.5016	90	5	2	2	0	0					0	1	3	3	3		170	2	2	73	14			0.15	0.15	2
CA307800	CA307802	42	1	4	24	9	11	1	3	46.5	1.63	17.5016	90	5	2	2	0	0					0	1	3	3	3		170	2	1	62	17					2
CA307800	CA307803	42	1	4	24	9	11	1	3	46.5	1.63	17.5016	90	5	2	2	0	0					0	1	3	3	3		170	2	2	60	17					2
SE308400	SE308401	26	1	6	52	9	10	1	3	45	1.59	17.7999	90	5	2	2	0	0	1	16		46	0	3	3	3	3	3	23	3	2	67	19			0.77	0.77	2
SE308400	SE308402	26	1	6	52	9	10	1	3	45	1.59	17.7999	90	5	2	2	0	0	1	16		46	0	3	3	3	3	3	23	3	2	20	17			7.93	7.93	2
SE308400	SE308403	26	1	6	52	9	10	1	3	45	1.59	17.7999	90	5	2	2	0	0	1	16		46	0	3	3	3	3	3	23	3	2	41	17			3.71	3.71	2
SE308400	SE308404	26	1	6	52	9	10	1	3	45	1.59	17.7999	90	5	2	2	0	0	1	16		46	0	3	3	3	3	3	23	3	2	9	14			10	10	2
SE308400	SE308405	26	1	6	52	9	10	1	3	45	1.59	17.7999	90	5	2	2	0	0	1	16		46	0	3	3	3	3	3	23	3	1	49	14			10	10	2
SE308400	SE308406	26	1	6	52	9	10	1	3	45	1.59	17.7999	90	5	2	2	0	0	1	16		46	0	3	3	3	3	3	23	3	1	68	18			10	10	2
SE308500	SE308501	37	1	8	24	3	17	1	3	49	1.69	17.1563	90	10	5	4	5	1	1	7	14		0	2	1	3	3	1	30	3	1	69	0	0		0.44	0.44	0
SE308500	SE308503	37	1	8	24	3	17	1	3	49	1.69	17.1563	90	10	5	4	5	1	1	7	14		0	2	1	3	3	1	30	3	1	34	10			0	0	2
SE308500	SE308504	37	1	8	24	3	17	1	3	49	1.69	17.1563	90	10	5	4	5	1	1	7	14		0	2	1	3	3	1	30	3	2	30	10			0.28	0.28	2
SE308500	SE308505	37	1	8	24	3	17	1	3	49	1.69	17.1563	90	10	5	4	5	1	1	7	14		0	2	1	3	3	1	30	3	2	1	4	0		0.08	0.08	0
SE308500	SE308506	37	1	8	24	3	17	1	3	49	1.69	17.1563	90	10	5	4	5	1	1	7	14		0	2	1	3	3	1	30	3	2	43	0	0		0.09	0.09	0
SE308500	SE308507	37	1	8	24	3	17	1	3	49	1.69	17.1563	90	10	5	4	5	1	1	7	14		0	2	1	3	3	1	30	3	1	12	0	0		0.17	0.17	0
SE308500	SE308508	37	1	8	24	3	17	1	3	49	1.69	17.1563	90	10	5	4	5	1	1	7	14		0	2	1	3	3	1	30	3	1	18	0	0		0.04	0.04	0
SE308600	SE308601	20	2	3	12	10	10	1	2	52	1.68	18.424	80	3	2	1	0	0			14		0	3	2	3	3		37	3	1	22	10			0.078	0.078	2
SE308600	SE308602	20	2	3	12	10	10	1	2	52	1.68	18.424	80	3	2	1	0	0			14		0	3	2	3	3		37	3	1	2	17			10	10	2
SE308600	SE308603	20	2	3	12	10	10	1	2	52	1.68	18.424	80	3	2	1	0	0			14		0	3	2	3	3		37	3	2	47	0	0		0.442	0.442	0
VT307500	VT307501	19	2	4	12	9	11	1	3	47.5	1.67	17.0318	90	7	6	1	2	1			14	47	0	1	2		2	2	39	1	2	57	15					2
VT307500	VT307502	19	2	4	12	9	11	1	3	47.5	1.67	17.0318	90	7	6	1	2	1			14	47	0	1	2		2	2	39	1	2	34	20			0.01	0.01	2
VT307500	VT307503	19	2	4	12	9	11	1	3	47.5	1.67	17.0318	90	7	6	1	2	1			14	47	0	1	2		2	2	39	1	1	14	0	0		0	0	0
VT307500	VT307504	19	2	4	12	9	11	1	3	47.5	1.67	17.0318	90	7	6	1	2	1			14	47	0	1	2		2	2	39	1	2	15	13			0.02	0.02	2
VT307600	VT307601	45	2	4	4	5	17	1	3	50.8	1.52	21.9875	80	5	4	1	0	0	1	5			4	3	3	3	3	1	26	1	1	49	14			0.013	0.013	2
VT307600	VT307602	45	2	4	4	5	17	1	3	50.8	1.52	21.9875	80	5	4	1	0	0	1	5			4	3	3	3	3	1	26	1	1	24	22			7.65	7.65	2
VT307600	VT307603	45	2	4	4	5	17	1	3	50.8	1.52	21.9875	80	5	4	1	0	0	1	5			4	3	3	3	3	1	26	1	2	25	15			0.75	0.75	2
VT307700	VT307701	41	2	5	2	8	11	1	3	75.9	1.6	29.6484	90	5	7	2	68	2	1	39	14	12	0	3	2	3	3	10	41	2	1	40	17					2
VT307700	VT307702	41	2	5	2	8	11	1	3	75.9	1.6	29.6484	90	5	7	2	68	2	1	39	14	12	0	3	2	3	3	10	41	2	2	15	6	20		10	10	1
VT307700	VT307703	41	2	5	2	8	11	1	3	75.9	1.6	29.6484	90	5	7	2	68	2	1	39	14	12	0	3	2	3	3	10	41	2	2	12	0	24		10	10	1
VT307700	VT307704	41	2	5	2	8	11	1	3	75.9	1.6	29.6484	90	5	7	2	68	2	1	39	14	12	0	3	2	3	3	10	41	2	1	1	13			10	10	2
VT307700	VT307705	41	2	5	2	8	11	1	3	75.9	1.6	29.6484	90	5	7	2	68	2	1	39	14	12	0	3	2	3	3	10	41	2	2	18	15			10	10	2
VT307800	VT307801	73	1	5	16	5	11	1	3	74	1.7	25.6055	90	9	4	1	0	0	1	27		20	0	1	1	2	2	10		2	2	67	16			-0.01	-0.01	2
VT307800	VT307803	73	1	5	16	5	11	1	3	74	1.7	25.6055	90	9	4	1	0	0	1	27		20	0	1	1	2	2	10		2	1	17	17			3.59	3.59	2
VT307800	VT307804	73	1	5	16	5	11	1	3	74	1.7	25.6055	90	9	4	1	0	0	1	27		20	0	1	1	2	2	10		2	1	15	14					2
VT307800	VT307805	73	1	5	16	5	11	1	3	74	1.7	25.6055	90	9	4	1	0	0	1	27		20	0	1	1	2	2	10		2	1	63	22			10	10	2
VT307900	VT307901	18	1	8	4	5	14	1	3	48	1.63	18.0662	90	6	6	2	5	1			30		1	2	3		3		400	3	2	84	20			10	10	2
VT307900	VT307902	18	1	8	4	5	14	1	3	48	1.63	18.0662	90	6	6	2	5	1			30		1	2	3		3		400	3	2	61	20			10	10	2
VT307900	VT307903	18	1	8	4	5	14	1	3	48	1.63	18.0662	90	6	6	2	5	1			30		1	2	3		3		400	3	1	37	25			10	10	2
VT307900	VT307904	18	1	8	4	5	14	1	3	48	1.63	18.0662	90	6	6	2	5	1			30		1	2	3		3		400	3	2	31	18			5.75	5.75	2
VT307900	VT307905	18	1	8	4	5	14	1	3	48	1.63	18.0662	90	6	6	2	5	1			30		1	2	3		3		400	3	1	22	13			10	10	2
VT307900	VT307906	18	1	8	4	5	14	1	3	48	1.63	18.0662	90	6	6	2	5	1			30		1	2	3		3		400	3	2	49	0	25		10	10	1
VT307900	VT307907	18	1	8	4	5	14	1	3	48	1.63	18.0662	90	6	6	2	5	1			30		1	2	3		3		400	3	1	15	21			10	10	2
VT307900	VT307908	18	1	8	4	5	14	1	3	48	1.63	18.0662	90	6	6	2	5	1			30		1	2	3		3		400	3	1	33	24					2
VT308000	VT308001	33	1	3	3	8	14	1	3	54	1.61	20.8325	90	7	7	2	0	0	1	9		21	2	2	3	3	3	1	380	3	2	52	22					2
VV303100	VV303101	44	1	4	8	1	18	1	3	50	1.66	18.1449	90	4	2	1	6	1			18		0	3	3	2	3		45	3	2	40	14			0.12	0.12	2
VV303100	VV303102	44	1	4	8	1	18	1	3	50	1.66	18.1449	90	4	2	1	6	1			18		0	3	3	2	3		45	3	1	16	13			10	10	2
VV303100	VV303103	44	1	4	8	1	18	1	3	50	1.66	18.1449	90	4	2	1	6	1			18		0	3	3	2	3		45	3	1	14	19			10	10	2
VV303100	VV303104	44	1	4	8	1	18	1	3	50	1.66	18.1449	90	4	2	1	6	1			18		0	3	3	2	3		45	3	2	9	18			10	10	2
CA701000	CA701001	30.7	1	7	36	7	15	0	1	57	170	19.7232	90	5	4	1	4	1	1	5	30	33	0	2+	2+	3+	3	2	340	2	2	32	18					2
CA701000	CA701002	30.7	1	7	36	7	15	0	1	57	170	19.7232	90	5	4	1	4	1	1	5	30	33	0	2+	2+	3+	3	2	340	2	2	31	18					2
CA701000	CA701005	30.7	1	7	36	7	15	0	1	57	170	19.7232	90	5	4	1	4	1	1	5	30	33	0	2+	2+	3+	3	2	340	2	2	8	20					2
CA701000	CA701006	30.7	1	7	36	7	15	0	1	57	170	19.7232	90	5	4	1	4	1	1	5	30	33	0	2+	2+	3+	3	2	340	2	2	62	15					2
CA701000	CA701007	30.7	1	7	36	7	15	0	1	57	170	19.7232	90	5	4	1	4	1	1	5	30	33	0	2+	2+	3+	3	2	340	2	2	82	0	0	-0.027	0.009	0.009	0
CA701200	CA701201	30.6	1	3	12	5	19	1	2	50.6	167	18.1434	80				333	2	3		12	17	0	neg	neg	neg	1	4	490	3	2	40	18					2
CA701200	CA701202	30.6	1	3	12	5	19	1	2	50.6	167	18.1434	80				333	2	3		12	17	0	neg	neg	neg	1	4	490	3	2	16	15					2
CA701200	CA701203	30.6	1	3	12	5	19	1	2	50.6	167	18.1434	80				333	2	3		12	17	0	neg	neg	neg	1	4	490	3	1	18	20					2
CA701400	CA701401	44.6	1	5	16	5	17	1	3	54.7	175	17.8612	80	7	7	2	57	2	3		16		0	2+	1+	neg	2	5	340	2	2	41	22					2
CA701400	CA701402	44.6	1	5	16	5	17	1	3	54.7	175	17.8612	80	7	7	2	57	2	3		16		0	2+	1+	neg	2	5	340	2	2	19	18					2
CA701400	CA701403	44.6	1	5	16	5	17	1	3	54.7	175	17.8612	80	7	7	2	57	2	3		16		0	2+	1+	neg	2	5	340	2	1	13	7	7	-0.08	0.58	0.58	0
CA701400	CA701404	44.6	1	5	16	5	17	1	3	54.7	175	17.8612	80	7	7	2	57	2	3		16		0	2+	1+	neg	2	5	340	2	2	20	19					2
CA701400	CA701405	44.6	1	5	16	5	17	1	3	54.7	175	17.8612	80	7	7	2	57	2	3		16		0	2+	1+	neg	2	5	340	2	1	24	12					2
CA701500	CA701501	42.1	1	6	16	6	13	1	3	64.6	172	21.8361	80				203	2	1	4	14	22	0	2+	3+	2+	3	7	440	3	2	27	22					2
CA701500	CA701502	42.1	1	6	16	6	13	1	3	64.6	172	21.8361	80				203	2	1	4	14	22	0	2+	3+	2+	3	7	440	3	1	17	12					2
CA701500	CA701503	42.1	1	6	16	6	13	1	3	64.6	172	21.8361	80				203	2	1	4	14	22	0	2+	3+	2+	3	7	440	3	2	18	20					2
CA701500	CA701504	42.1	1	6	16	6	13	1	3	64.6	172	21.8361	80				203	2	1	4	14	22	0	2+	3+	2+	3	7	440	3	2	11	17					2
CA701500	CA701505	42.1	1	6	16	6	13	1	3	64.6	172	21.8361	80				203	2	1	4	14	22	0	2+	3+	2+	3	7	440	3	2	3	15					2
CA701500	CA701506	42.1	1	6	16	6	13	1	3	64.6	172	21.8361	80				203	2	1	4	14	22	0	2+	3+	2+	3	7	440	3	1	1	18					2
CA701600	CA701601	21.2	2	5	4	10	9	1	3	57.2	166	20.7577	80	3	3	2	98	2	1	4	14	46	0	1+	3+	neg	3	10	90	2	1	41	23					2
CA701600	CA701602	21.2	2	5	4	10	9	1	3	57.2	166	20.7577	80	3	3	2	98	2	1	4	14	46	0	1+	3+	neg	3	10	90	2	1	16	14					2
CA701600	CA701603	21.2	2	5	4	10	9	1	3	57.2	166	20.7577	80	3	3	2	98	2	1	4	14	46	0	1+	3+	neg	3	10	90	2	2	41	0	0	5.59	31.66	31.66	0
CA701600	CA701604	21.2	2	5	4	10	9	1	3	57.2	166	20.7577	80	3	3	2	98	2	1	4	14	46	0	1+	3+	neg	3	10	90	2	2	12	0	0	0	0.03	0.03	0
CA701600	CA701605	21.2	2	5	4	10	9	1	3	57.2	166	20.7577	80	3	3	2	98	2	1	4	14	46	0	1+	3+	neg	3	10	90	2	2	0	13					2
CA701700	CA701701	64.3	1	20	48	4	15	1	3	64.8	168	22.9592	80	7	4	2	67	2	1	5	16	20	0	neg	1+	3+	3	2	220	1	2	37	28					2
CA701700	CA701702	64.3	1	20	48	4	15	1	3	64.8	168	22.9592	80	7	4	2	67	2	1	5	16	20	0	neg	1+	3+	3	2	220	1	2	48	17					2
CA701700	CA701703	64.3	1	20	48	4	15	1	3	64.8	168	22.9592	80	7	4	2	67	2	1	5	16	20	0	neg	1+	3+	3	2	220	1	1	16	19					2
CA701700	CA701704	64.3	1	20	48	4	15	1	3	64.8	168	22.9592	80	7	4	2	67	2	1	5	16	20	0	neg	1+	3+	3	2	220	1	1	40	18					2
CA701700	CA701705	64.3	1	20	48	4	15	1	3	64.8	168	22.9592	80	7	4	2	67	2	1	5	16	20	0	neg	1+	3+	3	2	220	1	2	27	0		0.01			0
CA701700	CA701706	64.3	1	20	48	4	15	1	3	64.8	168	22.9592	80	7	4	2	67	2	1	5	16	20	0	neg	1+	3+	3	2	220	1	2	50	22					2
CA701700	CA701708	64.3	1	20	48	4	15	1	3	64.8	168	22.9592	80	7	4	2	67	2	1	5	16	20	0	neg	1+	3+	3	2	220	1	2	27	15					2
CA701700	CA701709	64.3	1	20	48	4	15	1	3	64.8	168	22.9592	80	7	4	2	67	2	1	5	16	20	0	neg	1+	3+	3	2	220	1	1	16	18					2
CA701700	CA701710	64.3	1	20	48	4	15	1	3	64.8	168	22.9592	80	7	4	2	67	2	1	5	16	20	0	neg	1+	3+	3	2	220	1	1	53	23					2
CA701700	CA701712	64.3	1	20	48	4	15	1	3	64.8	168	22.9592	80	7	4	2	67	2	1	5	16	20	0	neg	1+	3+	3	2	220	1	1	13	0		0			0
CA701700	CA701714	64.3	1	20	48	4	15	1	3	64.8	168	22.9592	80	7	4	2	67	2	1	5	16	20	0	neg	1+	3+	3	2	220	1	2	4	14					2
CA701700	CA701716	64.3	1	20	48	4	15	1	3	64.8	168	22.9592	80	7	4	2	67	2	1	5	16	20	0	neg	1+	3+	3	2	220	1	2	10	14					2
CA701700	CA701718	64.3	1	20	48	4	15	1	3	64.8	168	22.9592	80	7	4	2	67	2	1	5	16	20	0	neg	1+	3+	3	2	220	1	2	59	23					2
CA701700	CA701720	64.3	1	20	48	4	15	1	3	64.8	168	22.9592	80	7	4	2	67	2	1	5	16	20	0	neg	1+	3+	3	2	220	1	2	58	20					2
CA701900	CA701901	46.5	1	3	24	7	14	1	3	51.9	167	18.6095	80				1	1	1	10	30		1	3+	3+	3+	3	4	370	3	2	31	22					2
CA701900	CA701902	46.5	1	3	24	7	14	1	3	51.9	167	18.6095	80				1	1	1	10	30		1	3+	3+	3+	3	4	370	3	2	7	18					2
CA701900	CA701903	46.5	1	3	24	7	14	1	3	51.9	167	18.6095	80				1	1	1	10	30		1	3+	3+	3+	3	4	370	3	2	10	15					2
CA702000	CA702001	49.5	1	4	32	6	19	1	3	61.5	172	20.7883	80	4	2	1	0	0					0	3+	3+	neg	3		450	3	2	48	15					2
CA702000	CA702002	49.5	1	4	32	6	19	1	3	61.5	172	20.7883	80	4	2	1	0	0					0	3+	3+	neg	3		450	3	2	73	0	0	0.33	7.56	7.56	0
CA702000	CA702003	49.5	1	4	32	6	19	1	3	61.5	172	20.7883	80	4	2	1	0	0					0	3+	3+	neg	3		450	3	1	28	0	0	15.12	7.25	15.12	0
CA702800	CA702801	43.9	2	4	4	7	11	1	2	72.4	163	27.2498	80	5	3	2	2	1	1	7	21	24	0	1+	2+	neg	3	21	200	2	2	24	0	0	0	-0.03	0	0
CA702800	CA702802	43.9	2	4	4	7	11	1	2	72.4	163	27.2498	80	5	3	2	2	1	1	7	21	24	0	1+	2+	neg	3	21	200	2	2	20	0	0	0	0.04	0	0
CA702800	CA702803	43.9	2	4	4	7	11	1	2	72.4	163	27.2498	80	5	3	2	2	1	1	7	21	24	0	1+	2+	neg	3	21	200	2	1	44	12					2
CA702800	CA702804	43.9	2	4	4	7	11	1	2	72.4	163	27.2498	80	5	3	2	2	1	1	7	21	24	0	1+	2+	neg	3	21	200	2	1	4	0	0				0
CA703400	CA703401	20	2	4	12	4	16	1	3	52	163	19.5717	80	7	4	2	0	0					0	1+	neg	1+	1		280	1	2	44	20					2
CA703400	CA703403	20	2	4	12	4	16	1	3	52	163	19.5717	80	7	4	2	0	0					0	1+	neg	1+	1		280	1	2	25	15					2
CA703400	CA703404	20	2	4	12	4	16	1	3	52	163	19.5717	80	7	4	2	0	0					0	1+	neg	1+	1		280	1	1	21	0	0	0.04	0	0.04	0
SE701600	SE701601	24.7	1	3	6	4	15	1	3	58	176	18.7242	80				3	1			16		0	2+	2+		2		420	2	2	18	17					2
SE701600	SE701602	24.7	1	3	6	4	15	1	3	58	176	18.7242	80				3	1			16		0	2+	2+		2		420	2	1	16	15					2
SE701600	SE701603	24.7	1	3	6	4	15	1	3	58	176	18.7242	80				3	1			16		0	2+	2+		2		420	2	2	20	10					2
SE701800	SE701801	30.2	1	4	12	8	15	1	3	52	179	16.2292	90	5	4	2	0	0	1	5		32	3	3+	3+	3+	3	7	220	2	2	29	14					2
SE701800	SE701802	30.2	1	4	12	8	15	1	3	52	179	16.2292	90	5	4	2	0	0	1	5		32	3	3+	3+	3+	3	7	220	2	1	5	14					2
SE701800	SE701803	30.2	1	4	12	8	15	1	3	52	179	16.2292	90	5	4	2	0	0	1	5		32	3	3+	3+	3+	3	7	220	2	2	12	11					2
SE701800	SE701804	30.2	1	4	12	8	15	1	3	52	179	16.2292	90	5	4	2	0	0	1	5		32	3	3+	3+	3+	3	7	220	2	2	13	7	12	1.94	2.84	2.84	0
SE701900	SE701901	20.5	1	5	5	5	14	0	2	49.9	172	16.8672	80	8	5	2	201	2	1	3	14	27	0	neg	2+	3+	3	8	180	2	2	40	17					2
SE701900	SE701902	20.5	1	5	5	5	14	0	2	49.9	172	16.8672	80	8	5	2	201	2	1	3	14	27	0	neg	2+	3+	3	8	180	2	1	56	0	8	2.85	0.1	2.85	0
SE701900	SE701903	20.5	1	5	5	5	14	0	2	49.9	172	16.8672	80	8	5	2	201	2	1	3	14	27	0	neg	2+	3+	3	8	180	2	1	19	11					2
SE701900	SE701904	20.5	1	5	5	5	14	0	2	49.9	172	16.8672	80	8	5	2	201	2	1	3	14	27	0	neg	2+	3+	3	8	180	2	2	17	21					2
SE701900	SE701905	20.5	1	5	5	5	14	0	2	49.9	172	16.8672	80	8	5	2	201	2	1	3	14	27	0	neg	2+	3+	3	8	180	2	2	11	20					2
SE702000	SE702001	20.5	2	3	12	9	9	1	2	52.1	162	19.8522	80				49	2	1	6	12		1	2+	3+		3	1	180	2	1	23	17					2
SE702000	SE702002	20.5	2	3	12	9	9	1	2	52.1	162	19.8522	80				49	2	1	6	12		1	2+	3+		3	1	180	2	2	2	19					2
SE702000	SE702003	20.5	2	3	12	9	9	1	2	52.1	162	19.8522	80				49	2	1	6	12		1	2+	3+		3	1	180	2	2		13					2
SE702200	SE702201	29.3	1	3	8	5	16	1	3	59.7	170	20.6574	80				41	2	1	6	30	32	0	2+	2+	neg	2	7	280	2	1	42	16					2
SE702200	SE702202	29.3	1	3	8	5	16	1	3	59.7	170	20.6574	80				41	2	1	6	30	32	0	2+	2+	neg	2	7	280	2	2	50	10					2
SE702200	SE702203	29.3	1	3	8	5	16	1	3	59.7	170	20.6574	80				41	2	1	6	30	32	0	2+	2+	neg	2	7	280	2	2	40	12					2
SE702300	SE702301	57.6	1	5	48	7	12	1	3	61.6	162	23.472	90				75	2	1	4	16	17	0	3+	3+	3+	3	7	150	1	2	27	13					2
SE702300	SE702302	57.6	1	5	48	7	12	1	3	61.6	162	23.472	90				75	2	1	4	16	17	0	3+	3+	3+	3	7	150	1	1	29	16					2
SE702300	SE702303	57.6	1	5	48	7	12	1	3	61.6	162	23.472	90				75	2	1	4	16	17	0	3+	3+	3+	3	7	150	1	1	7	12					2
SE702300	SE702304	57.6	1	5	48	7	12	1	3	61.6	162	23.472	90				75	2	1	4	16	17	0	3+	3+	3+	3	7	150	1	1	29	14					2
SE702300	SE702305	57.6	1	5	48	7	12	1	3	61.6	162	23.472	90				75	2	1	4	16	17	0	3+	3+	3+	3	7	150	1	1	24	12					2
SE702500	SE702501	46.9	2	6	14	10	7	1	2	52.9	148	24.1508	80	5	3	2	8	1			21		1	3+	3+	1+	3		220	2	1	54	10					2
SE702500	SE702502	46.9	2	6	14	10	7	1	2	52.9	148	24.1508	80	5	3	2	8	1			21		1	3+	3+	1+	3		220	2	1	27	15					2
SE702500	SE702503	46.9	2	6	14	10	7	1	2	52.9	148	24.1508	80	5	3	2	8	1			21		1	3+	3+	1+	3		220	2	2	13	16					2
SE702500	SE702504	46.9	2	6	14	10	7	1	2	52.9	148	24.1508	80	5	3	2	8	1			21		1	3+	3+	1+	3		220	2	2	29	12					2
SE702500	SE702505	46.9	2	6	14	10	7	1	2	52.9	148	24.1508	80	5	3	2	8	1			21		1	3+	3+	1+	3		220	2	2	12	21					2
SE702500	SE702506	46.9	2	6	14	10	7	1	2	52.9	148	24.1508	80	5	3	2	8	1			21		1	3+	3+	1+	3		220	2	1	3	0	0	0.004	0.02	0.02	0
SE703800	SE703801	42.1	1	5	192	8	17	1	3	71.5	175	23.3469	80				0	0	1	4			0	3+	3+	2+	3	2	260	2			16					2
SE703800	SE703802	42.1	1	5	192	8	17	1	3	71.5	175	23.3469	80				0	0	1	4			0	3+	3+	2+	3	2	260	2			11					2
SE703800	SE703803	42.1	1	5	192	8	17	1	3	71.5	175	23.3469	80				0	0	1	4			0	3+	3+	2+	3	2	260	2			10					2
SE703800	SE703804	42.1	1	5	192	8	17	1	3	71.5	175	23.3469	80				0	0	1	4			0	3+	3+	2+	3	2	260	2			13					2
SE703800	SE703805	42.1	1	5	192	8	17	1	3	71.5	175	23.3469	80				0	0	1	4			0	3+	3+	2+	3	2	260	2			20					2
SE703900	SE703901	36.5	1	4	4	5	16	1	3	68.8	187	19.6746	90	4	1	1	3	1	1	4	21	28	0	3+	3+	3+	3	1	280	2	2	27	21					2
SE703900	SE703902	36.5	1	4	4	5	16	1	3	68.8	187	19.6746	90	4	1	1	3	1	1	4	21	28	0	3+	3+	3+	3	1	280	2	1	67	0	0	-0.02	0	0	0
SE703900	SE703903	36.5	1	4	4	5	16	1	3	68.8	187	19.6746	90	4	1	1	3	1	1	4	21	28	0	3+	3+	3+	3	1	280	2	2	68	6	14	-0.01	0	0	0
SE703900	SE703904	36.5	1	4	4	5	16	1	3	68.8	187	19.6746	90	4	1	1	3	1	1	4	21	28	0	3+	3+	3+	3	1	280	2	1	21	4	12	-0.03	0	0	1
SE704000	SE704001	19.5	1	4	3	6	15	1	3	57.5	166	20.8666	90	5	2	1	0	0	1	5			0	3+			3	2	290	1	1	24	16					2
SE704000	SE704002	19.5	1	4	3	6	15	1	3	57.5	166	20.8666	90	5	2	1	0	0	1	5			0	3+			3	2	290	1	2	22	10					2
SE704000	SE704003	19.5	1	4	3	6	15	1	3	57.5	166	20.8666	90	5	2	1	0	0	1	5			0	3+			3	2	290	1	1	9	0	0	0.03	0	0	0
SE704000	SE704004	19.5	1	4	3	6	15	1	3	57.5	166	20.8666	90	5	2	1	0	0	1	5			0	3+			3	2	290	1	1	4	14					2
SE704100	SE704103	51.8	1	4	12	3	15	1	2	68.3	177	21.8009	80	5	4	2	0	0	1	6		13	0	2+	3+	3+	3	3	450	3	2	46	4	0	0.1	0.1	0.1	0
SE704300	SE704301	21.5	1	4	12	7	15	1	2	52.9	179	16.5101	80	4	1	1	0	0					0	2+	3+		3		370	3	2	27	14					2
SE704300	SE704302	21.5	1	4	12	7	15	1	2	52.9	179	16.5101	80	4	1	1	0	0					0	2+	3+		3		370	3	2	7	2	0	0	-0.01	0	0
SE704300	SE704303	21.5	1	4	12	7	15	1	2	52.9	179	16.5101	80	4	1	1	0	0					0	2+	3+		3		370	3	2	1	11					2
SE704300	SE704304	21.5	1	4	12	7	15	1	2	52.9	179	16.5101	80	4	1	1	0	0					0	2+	3+		3		370	3	2	62	0	14	25.12	16.74	25.12	1
VT701200	VT701201	20.9	1	6	12	8	11	1	3	64.2	185	18.7582	80	6	2	1	85	2	1	3	12	26	0	3+	3+	3+	3	10	330	2	2	51	13					2
VT701200	VT701202	20.9	1	6	12	8	11	1	3	64.2	185	18.7582	80	6	2	1	85	2	1	3	12	26	0	3+	3+	3+	3	10	330	2	2	16	15					2
VT701200	VT701203	20.9	1	6	12	8	11	1	3	64.2	185	18.7582	80	6	2	1	85	2	1	3	12	26	0	3+	3+	3+	3	10	330	2	1	2	12					2
VT701200	VT701204	20.9	1	6	12	8	11	1	3	64.2	185	18.7582	80	6	2	1	85	2	1	3	12	26	0	3+	3+	3+	3	10	330	2	1	12	0		-0.054			0
VT701200	VT701205	20.9	1	6	12	8	11	1	3	64.2	185	18.7582	80	6	2	1	85	2	1	3	12	26	0	3+	3+	3+	3	10	330	2	2	8	0	22	-0.063	20.08	20.08	1
VT701200	VT701206	20.9	1	6	12	8	11	1	3	64.2	185	18.7582	80	6	2	1	85	2	1	3	12	26	0	3+	3+	3+	3	10	330	2	1	5	0	28	-0.03	20.04	20.04	1
VT701200	VT701207	20.9	1	6	12	8	11	1	3	64.2	185	18.7582	80	6	2	1	85	2	1	3	12	26	0	3+	3+	3+	3	10	330	2	2	29	20					2
VT701300	VT701301	73.1	2	14	12	10	14	1	2	55.4	150	24.6222	80	6	3	2	0	0	1	4		25	0	3+	3+	3+	3	5	0	1	1	68	0	0	9.615	6.5	9.615	0
VT701300	VT701302	73.1	2	14	12	10	14	1	2	55.4	150	24.6222	80	6	3	2	0	0	1	4		25	0	3+	3+	3+	3	5	0	1	2	52	0	14	3	2.3	3	1
VT701300	VT701303	73.1	2	14	12	10	14	1	2	55.4	150	24.6222	80	6	3	2	0	0	1	4		25	0	3+	3+	3+	3	5	0	1	1	34	0	14	0.006	0.04	0.04	1
VT701300	VT701304	73.1	2	14	12	10	14	1	2	55.4	150	24.6222	80	6	3	2	0	0	1	4		25	0	3+	3+	3+	3	5	0	1	2	31	10					2
VT701300	VT701305	73.1	2	14	12	10	14	1	2	55.4	150	24.6222	80	6	3	2	0	0	1	4		25	0	3+	3+	3+	3	5	0	1	1	35	0	3	0.079	-0.07	0.079	0
VT701300	VT701306	73.1	2	14	12	10	14	1	2	55.4	150	24.6222	80	6	3	2	0	0	1	4		25	0	3+	3+	3+	3	5	0	1	2	44	0	22	0.126	-0.04	0.126	1
VT701300	VT701307	73.1	2	14	12	10	14	1	2	55.4	150	24.6222	80	6	3	2	0	0	1	4		25	0	3+	3+	3+	3	5	0	1	1	15	5	0	0.039	0.67	0.67	0
VT701300	VT701308	73.1	2	14	12	10	14	1	2	55.4	150	24.6222	80	6	3	2	0	0	1	4		25	0	3+	3+	3+	3	5	0	1	2	22	3	0	0.007	0.03	0.03	0
VT701300	VT701309	73.1	2	14	12	10	14	1	2	55.4	150	24.6222	80	6	3	2	0	0	1	4		25	0	3+	3+	3+	3	5	0	1	2	16	0	0	0.019	-0.04	0.019	0
VT701300	VT701310	73.1	2	14	12	10	14	1	2	55.4	150	24.6222	80	6	3	2	0	0	1	4		25	0	3+	3+	3+	3	5	0	1	2	31	0	0	-0.165	-0.02	-0.02	0
VT701300	VT701311	73.1	2	14	12	10	14	1	2	55.4	150	24.6222	80	6	3	2	0	0	1	4		25	0	3+	3+	3+	3	5	0	1	2	6	0	0	-0.045	-0.03	-0.03	0
VT701300	VT701312	73.1	2	14	12	10	14	1	2	55.4	150	24.6222	80	6	3	2	0	0	1	4		25	0	3+	3+	3+	3	5	0	1	2	7	0	0	0.039	-0.01	-0.01	0
VT701300	VT701313	73.1	2	14	12	10	14	1	2	55.4	150	24.6222	80	6	3	2	0	0	1	4		25	0	3+	3+	3+	3	5	0	1	2	1	10					2
VT701300	VT701314	73.1	2	14	12	10	14	1	2	55.4	150	24.6222	80	6	3	2	0	0	1	4		25	0	3+	3+	3+	3	5	0	1	1	31	0	14	-0.018	-0.03	-0.03	1
VT701500	VT701501	40.2	1	5	36	4	15	0	3	67.8	168	24.0221	90				0	0	1	7			0	neg	1+	2+	2	4	230	2	2	42	20					2
VT701500	VT701502	40.2	1	5	36	4	15	0	3	67.8	168	24.0221	90				0	0	1	7			0	neg	1+	2+	2	4	230	2	2	12	12					2
VT701500	VT701503	40.2	1	5	36	4	15	0	3	67.8	168	24.0221	90				0	0	1	7			0	neg	1+	2+	2	4	230	2	2	23	20					2
VT701600	VT701602	26.5	1	6	6	7	17	1	3	54.4	164	20.2261	80	9	5	2	106	2	1	4	30	26	0	3+	2+	3+	3	9	270	3	2	21	10					2
VT701600	VT701603	26.5	1	6	6	7	17	1	3	54.4	164	20.2261	80	9	5	2	106	2	1	4	30	26	0	3+	2+	3+	3	9	270	3	1	28	0		-0.01			0
VT701600	VT701604	26.5	1	6	6	7	17	1	3	54.4	164	20.2261	80	9	5	2	106	2	1	4	30	26	0	3+	2+	3+	3	9	270	3	2	21	0	0	-0.03	0	0	0
VT701600	VT701605	26.5	1	6	6	7	17	1	3	54.4	164	20.2261	80	9	5	2	106	2	1	4	30	26	0	3+	2+	3+	3	9	270	3	2	18	12					2
VT701600	VT701606	26.5	1	6	6	7	17	1	3	54.4	164	20.2261	80	9	5	2	106	2	1	4	30	26	0	3+	2+	3+	3	9	270	3	1	1	0	0	-0.03	0	0	0
VT701700	VT701701	23.1	2	7	20	8	11	1	2	57.3	165	21.0468	80	5	3	1	17	2	1	4	18		0	3+	3+	neg	3	10	280	3	1	22	0	0	-0.01	0	0	0
VT701700	VT701702	23.1	2	7	20	8	11	1	2	57.3	165	21.0468	80	5	3	1	17	2	1	4	18		0	3+	3+	neg	3	10	280	3	1	22	0	0	0.008	0.01	0.01	0
VT701700	VT701703	23.1	2	7	20	8	11	1	2	57.3	165	21.0468	80	5	3	1	17	2	1	4	18		0	3+	3+	neg	3	10	280	3	1	21	15					2
VT701700	VT701704	23.1	2	7	20	8	11	1	2	57.3	165	21.0468	80	5	3	1	17	2	1	4	18		0	3+	3+	neg	3	10	280	3	2	20	0	0	0.008	0.01	0.01	0
VT701700	VT701705	23.1	2	7	20	8	11	1	2	57.3	165	21.0468	80	5	3	1	17	2	1	4	18		0	3+	3+	neg	3	10	280	3	2	21	10					2
VT701700	VT701706	23.1	2	7	20	8	11	1	2	57.3	165	21.0468	80	5	3	1	17	2	1	4	18		0	3+	3+	neg	3	10	280	3	2	24	12					2
VT701700	VT701707	23.1	2	7	20	8	11	1	2	57.3	165	21.0468	80	5	3	1	17	2	1	4	18		0	3+	3+	neg	3	10	280	3	1	37	6	8	-0.03	0	0	0
VT701800	VT701801	20.9	1	4	4	6	14	0	1	55.1	160	21.5234	80	5	3	1	0	0					0	2+	1+	neg	2		310	3	1	56	15					2
VT701800	VT701802	20.9	1	4	4	6	14	0	1	55.1	160	21.5234	80	5	3	1	0	0					0	2+	1+	neg	2		310	3	2	53	5	0	-0.004	-0.02	-0.02	0
VT701800	VT701803	20.9	1	4	4	6	14	0	1	55.1	160	21.5234	80	5	3	1	0	0					0	2+	1+	neg	2		310	3	2	17	0		-0.001			0
VT701800	VT701804	20.9	1	4	4	6	14	0	1	55.1	160	21.5234	80	5	3	1	0	0					0	2+	1+	neg	2		310	3	2	14	0	0	0.035	0.01	0.01	0
VT701900	VT701901	45.4	1	5	40	6	17	1	3	71.6	174	23.6491	90	5	4	1	33	2	1	6	16		0	2+	3+	1+	3	20	350	3	1	49	20					2
VT701900	VT701902	45.4	1	5	40	6	17	1	3	71.6	174	23.6491	90	5	4	1	33	2	1	6	16		0	2+	3+	1+	3	20	350	3	2	45	0	15	2.04	27.98	27.98	1
VT701900	VT701903	45.4	1	5	40	6	17	1	3	71.6	174	23.6491	90	5	4	1	33	2	1	6	16		0	2+	3+	1+	3	20	350	3	1	24	20					2
VT701900	VT701904	45.4	1	5	40	6	17	1	3	71.6	174	23.6491	90	5	4	1	33	2	1	6	16		0	2+	3+	1+	3	20	350	3	2	18	10					2
VT701900	VT701905	45.4	1	5	40	6	17	1	3	71.6	174	23.6491	90	5	4	1	33	2	1	6	16		0	2+	3+	1+	3	20	350	3	2	10	0	20	0.96	29.94	29.94	1
VT703000	VT703002	27.1	1	5	32	10	13	1	3	44.3	163	16.6736	90				0	0	1	9		24	0	2+	1+	2+	2	0,5	290	2	1	22	20					2
VT703000	VT703004	27.1	1	5	32	10	13	1	3	44.3	163	16.6736	90				0	0	1	9		24	0	2+	1+	2+	2	0,5	290	2	1	12	18					2
VT703000	VT703005	27.1	1	5	32	10	13	1	3	44.3	163	16.6736	90				0	0	1	9		24	0	2+	1+	2+	2	0,5	290	2	1	10	21					2
VV701100	VV701101	30.9	1	6	20	5	15	0	2	65	174	21.4692	90	6	4	2	1	1	1	5	18		0	2+	1+	2+	3	10	480	3	2	20	0	14	0.01	30.53	30.53	1
VV701100	VV701102	30.9	1	6	20	5	15	0	2	65	174	21.4692	90	6	4	2	1	1	1	5	18		0	2+	1+	2+	3	10	480	3	2	5	0	0	-0.01	0	0	0
VV701100	VV701103	30.9	1	6	20	5	15	0	2	65	174	21.4692	90	6	4	2	1	1	1	5	18		0	2+	1+	2+	3	10	480	3	1	4	0	0	-0.07	0.04	0.04	0
VV701100	VV701104	30.9	1	6	20	5	15	0	2	65	174	21.4692	90	6	4	2	1	1	1	5	18		0	2+	1+	2+	3	10	480	3	1	2	0	0	0.01			0
VV701100	VV701105	30.9	1	6	20	5	15	0	2	65	174	21.4692	90	6	4	2	1	1	1	5	18		0	2+	1+	2+	3	10	480	3	1	22	0	0	0	0.01	0.01	0
VV701100	VV701106	30.9	1	6	20	5	15	0	2	65	174	21.4692	90	6	4	2	1	1	1	5	18		0	2+	1+	2+	3	10	480	3	1	63	0	0	0.35	1.6	1.6	0
VV701500	VV701501	35.2	1	5	10	5	15	0	1	86	177	27.4506	100	9	4	2	0	0					0	neg	neg	1+	1		620	3	2	34	12					2
VV701500	VV701502	35.2	1	5	10	5	15	0	1	86	177	27.4506	100	9	4	2	0	0					0	neg	neg	1+	1		620	3	2	5	4	16	7.2	0.32	0.32	1
VV701500	VV701503	35.2	1	5	10	5	15	0	1	86	177	27.4506	100	9	4	2	0	0					0	neg	neg	1+	1		620	3	2	79	0	0	0.15	-0.01	-0.01	0
VV701500	VV701504	35.2	1	5	10	5	15	0	1	86	177	27.4506	100	9	4	2	0	0					0	neg	neg	1+	1		620	3	1	75	0	12	0.02	0.13	0.13	1
VV701500	VV701505	35.2	1	5	10	5	15	0	1	86	177	27.4506	100	9	4	2	0	0					0	neg	neg	1+	1		620	3	2	65	23					2
VV702400	VV702401	55.4	2	10	28	10	10	1	3	45.9	152	19.8667	90	9	7	2	0	0	1	3			0	3+			3	10	270	2	1	37	0	0	0	0.01	0.01	0
VV702400	VV702402	55.4	2	10	28	10	10	1	3	45.9	152	19.8667	90	9	7	2	0	0	1	3			0	3+			3	10	270	2	2	33	0	0	0	0	0	0
VV702400	VV702403	55.4	2	10	28	10	10	1	3	45.9	152	19.8667	90	9	7	2	0	0	1	3			0	3+			3	10	270	2	2	21	9	16	0.03	0.01	0.01	0
VV702400	VV702404	55.4	2	10	28	10	10	1	3	45.9	152	19.8667	90	9	7	2	0	0	1	3			0	3+			3	10	270	2	1	18	6	14	1.46	0	0	0
VV702400	VV702405	55.4	2	10	28	10	10	1	3	45.9	152	19.8667	90	9	7	2	0	0	1	3			0	3+			3	10	270	2	1	17	0	0	-0.01	0	0	0
VV702400	VV702406	55.4	2	10	28	10	10	1	3	45.9	152	19.8667	90	9	7	2	0	0	1	3			0	3+			3	10	270	2	1	42	8	0	0.03	-0.01	0.03	0
VV702400	VV702407	55.4	2	10	28	10	10	1	3	45.9	152	19.8667	90	9	7	2	0	0	1	3			0	3+			3	10	270	2	1	23	0	0	-0.03	0	0	0
VV702400	VV702408	55.4	2	10	28	10	10	1	3	45.9	152	19.8667	90	9	7	2	0	0	1	3			0	3+			3	10	270	2	2	5	14					2
VV702400	VV702409	55.4	2	10	28	10	10	1	3	45.9	152	19.8667	90	9	7	2	0	0	1	3			0	3+			3	10	270	2	1	44	12					2

## Sheet: Dictionary
DICTIONARY
Gender			1 =male
			2= female
VACS			visual cough scale (From 0-10)
Leicester			Leicester cough scale (from 3-21)
Cavities			0 =no
			1=yes
Extent		Extent of disease in CXR	1= None/minimal
			2= Moderate
			3= Advanced
MGIT		Growth in MGIT media	0 =no
			1=yes
ttpmgit		Time to positive in MGIT (days)
ttpcass		time to positive CASS culture (days)
ttpsolid		time to positive in solid media (days)
AerosolCFU		Aerosol quantitative
Aerosol		Aerosol categorical	0 =none
			1= Low (1-9)
			2= High (10 or more)
spvol		sputum volume in ml
Coughstrenght		Strenght of cough	1= Weak
			2= Moderate
			3= Strong
Outcome			0= Persistently negative
			1= TST cpnverter
			2= TST+ at baseline

## Sheet: Index
indexid	ageindex	genderindex	contacts	timesick	VACS	leicester	cavities	extent	weightindex	heightindex	bmiindex	karnofski	#rooms	#windows	#doors	aerosolCFU	aerosol	mgit	ttpmgit	ttpcass	ttpsol	abtime	AFB1	AFB2	AFB3	AFBmax	spvol	peakflow	coughstrenght
CA307300	29	1	4	12	9	11	1	3	62.7	1.71	21.4425	90	6	4	2	29	2			14	32	0	2	2	2	2	5	49	2
CA307400	32	1	3	8	8	13	0	2	47.5	1.69	16.6311	90	5	4	2	85	2			12	48	0	3	3	3	3	2	53	2
CA307600	22	1	6	12	9	12	1	3	51.5	1.69	18.0316	90	6	2	1	2	1	1	3	21	15	0	3	3	3	3	1	230	2
CA307700	19	1	6	12	9	11	1	3	55	1.69	19.257	90	6	2	2	1	1			18		0	3	3	3	3		430	3
CA307800	42	1	4	24	9	11	1	3	46.5	1.63	17.5016	90	5	2	2	0	0					0	1	3	3	3		170	2
SE308400	26	1	6	52	9	10	1	3	45	1.59	17.7999	90	5	2	2	0	0	1	16		46	0	3	3	3	3	3	23	3
SE308500	37	1	8	24	3	17	1	3	49	1.69	17.1563	90	10	5	4	5	1	1	7	14		0	2	1	3	3	1	30	3
SE308600	20	2	3	12	10	10	1	2	52	1.68	18.424	80	3	2	1	0	0			14		0	3	2	3	3		37	3
VT307500	19	2	4	12	9	11	1	3	47.5	1.67	17.0318	90	7	6	1	2	1			14	47	0	1	2		2	2	39	1
VT307600	45	2	4	4	5	17	1	3	50.8	1.52	21.9875	80	5	4	1	0	0	1	5			4	3	3	3	3	1	26	1
VT307700	41	2	5	2	8	11	1	3	75.9	1.6	29.6484	90	5	7	2	68	2	1	39	14	12	0	3	2	3	3	10	41	2
VT307800	73	1	5	16	5	11	1	3	74	1.7	25.6055	90	9	4	1	0	0	1	27		20	0	1	1	2	2	10		2
VT307900	18	1	8	4	5	14	1	3	48	1.63	18.0662	90	6	6	2	5	1			30		1	2	3		3		400	3
VT308000	33	1	3	3	8	14	1	3	54	1.61	20.8325	90	7	7	2	0	0	1	9		21	2	2	3	3	3	1	380	3
VV303100	44	1	4	8	1	18	1	3	50	1.66	18.1449	90	4	2	1	6	1			18		0	3	3	2	3		45	3
CA701000	30.7	1	7	36	7	15	0	1	57	170	19.7232	90	5	4	1	4	1	1	5	30	33	0	2+	2+	3+	3	2	340	2
CA701200	30.6	1	3	12	5	19	1	2	50.6	167	18.1434	80				333	2	3		12	17	0	neg	neg	neg	1	4	490	3
CA701400	44.6	1	5	16	5	17	1	3	54.7	175	17.8612	80	7	7	2	57	2	3		16		0	2+	1+	neg	2	5	340	2
CA701500	42.1	1	6	16	6	13	1	3	64.6	172	21.8361	80				203	2	1	4	14	22	0	2+	3+	2+	3	7	440	3
CA701600	21.2	2	5	4	10	9	1	3	57.2	166	20.7577	80	3	3	2	98	2	1	4	14	46	0	1+	3+	neg	3	10	90	2
CA701700	64.3	1	20	48	4	15	1	3	64.8	168	22.9592	80	7	4	2	67	2	1	5	16	20	0	neg	1+	3+	3	2	220	1
CA701900	46.5	1	3	24	7	14	1	3	51.9	167	18.6095	80				1	1	1	10	30		1	3+	3+	3+	3	4	370	3
CA702000	49.5	1	4	32	6	19	1	3	61.5	172	20.7883	80	4	2	1	0	0					0	3+	3+	neg	3		450	3
CA702800	43.9	2	4	4	7	11	1	2	72.4	163	27.2498	80	5	3	2	2	1	1	7	21	24	0	1+	2+	neg	3	21	200	2
CA703400	20	2	4	12	4	16	1	3	52	163	19.5717	80	7	4	2	0	0					0	1+	neg	1+	1		280	1
SE701600	24.7	1	3	6	4	15	1	3	58	176	18.7242	80				3	1			16		0	2+	2+		2		420	2
SE701800	30.2	1	4	12	8	15	1	3	52	179	16.2292	90	5	4	2	0	0	1	5		32	3	3+	3+	3+	3	7	220	2
SE701900	20.5	1	5	5	5	14	0	2	49.9	172	16.8672	80	8	5	2	201	2	1	3	14	27	0	neg	2+	3+	3	8	180	2
SE702000	20.5	2	3	12	9	9	1	2	52.1	162	19.8522	80				49	2	1	6	12		1	2+	3+		3	1	180	2
SE702200	29.3	1	3	8	5	16	1	3	59.7	170	20.6574	80				41	2	1	6	30	32	0	2+	2+	neg	2	7	280	2
SE702300	57.6	1	5	48	7	12	1	3	61.6	162	23.472	90				75	2	1	4	16	17	0	3+	3+	3+	3	7	150	1
SE702500	46.9	2	6	14	10	7	1	2	52.9	148	24.1508	80	5	3	2	8	1			21		1	3+	3+	1+	3		220	2
SE703800	42.1	1	5	192	8	17	1	3	71.5	175	23.3469	80				0	0	1	4			0	3+	3+	2+	3	2	260	2
SE703900	36.5	1	4	4	5	16	1	3	68.8	187	19.6746	90	4	1	1	3	1	1	4	21	28	0	3+	3+	3+	3	1	280	2
SE704000	19.5	1	4	3	6	15	1	3	57.5	166	20.8666	90	5	2	1	0	0	1	5			0	3+			3	2	290	1
SE704100	51.8	1	4	12	3	15	1	2	68.3	177	21.8009	80	5	4	2	0	0	1	6		13	0	2+	3+	3+	3	3	450	3
SE704300	21.5	1	4	12	7	15	1	2	52.9	179	16.5101	80	4	1	1	0	0					0	2+	3+		3		370	3
VT701200	20.9	1	6	12	8	11	1	3	64.2	185	18.7582	80	6	2	1	85	2	1	3	12	26	0	3+	3+	3+	3	10	330	2
VT701300	73.1	2	14	12	10	14	1	2	55.4	150	24.6222	80	6	3	2	0	0	1	4		25	0	3+	3+	3+	3	5	0	1
VT701500	40.2	1	5	36	4	15	0	3	67.8	168	24.0221	90				0	0	1	7			0	neg	1+	2+	2	4	230	2
VT701600	26.5	1	6	6	7	17	1	3	54.4	164	20.2261	80	9	5	2	106	2	1	4	30	26	0	3+	2+	3+	3	9	270	3
VT701700	23.1	2	7	20	8	11	1	2	57.3	165	21.0468	80	5	3	1	17	2	1	4	18		0	3+	3+	neg	3	10	280	3
VT701800	20.9	1	4	4	6	14	0	1	55.1	160	21.5234	80	5	3	1	0	0					0	2+	1+	neg	2		310	3
VT701900	45.4	1	5	40	6	17	1	3	71.6	174	23.6491	90	5	4	1	33	2	1	6	16		0	2+	3+	1+	3	20	350	3
VT703000	27.1	1	5	32	10	13	1	3	44.3	163	16.6736	90				0	0	1	9		24	0	2+	1+	2+	2	1	290	2
VV701100	30.9	1	6	20	5	15	0	2	65	174	21.4692	90	6	4	2	1	1	1	5	18		0	2+	1+	2+	3	10	480	3
VV701500	35.2	1	5	10	5	15	0	1	86	177	27.4506	100	9	4	2	0	0					0	neg	neg	1+	1		620	3
VV702400	55.4	2	10	28	10	10	1	3	45.9	152	19.8667	90	9	7	2	0	0	1	3			0	3+			3	10	270	2
